# Supplementary material for: Combined transcriptome and proteome profiling reveal cell-type-specific functions of Drosophila garland and pericardial nephrocytes
Source: PubMed Central journal article supplement (PMC11530456; doi:10.1038/s42003-024-07062-z), 2024-11-01
Supplement: 42003_2024_7062_MOESM3_ESM.pdf [file 42003_2024_7062_MOESM3_ESM.pdf]

## Description of Additional Supplementary Files

1  
2  
3  
4  
5  
6  
7  
8  
9  
10  
11  
12  
13  
14  
15  
16  
17  
18  
19  
20  
21  
22  
23  
24  
25  
26  
27  
28  
29  
30  
31  
32  
33  
34  
35  
36  
37  
38  
39  
40  
41  
42  
43  
44  
45

### **Supplementary Data 1a: 1w Total vs 1w PNCs (Figure 2F)**

Depicted are proteins that exhibit altered amounts in 1w complete animals, relative to 1w pericardial cells.

### **Supplementary Data 1b: Increased in 1w PNCs vs Total (Figure 2G)**

Depicted are proteins with increased abundance in 1w pericardial cells, relative to 1w complete animals. Proteins are allocated to their individual KEGG pathways.

### **Supplementary Data 1c: Increased in 1w Total vs PNCs (Figure 2H)**

Depicted are proteins with increased abundance in 1w complete animals, relative to 1w pericardial cells. Proteins are allocated to their individual KEGG pathways.

### **Supplementary Data 2a: 1w PNCs vs 1w GNCs (Figure 5A')**

Depicted are proteins that exhibit altered amounts in 1w pericardial cells, relative to 1w garland cells.

### **Supplementary Data 2b: Increased in 1w PNCs vs GNCs (Figure 5B')**

Depicted are proteins with increased abundance in 1w pericardial cells, relative to 1w garland cells. Proteins are allocated to their individual KEGG pathways.

### **Supplementary Data 2c: Increased in 1w GNCs vs PNCs (Figure 6A')**

Depicted are proteins with increased abundance in 1w garland cells, relative to 1w pericardial cells. Proteins are allocated to their individual KEGG pathways.

### **Supplementary Data 3a: 1w Total vs 1w GNCs (Figure S1A')**

Depicted are proteins that exhibit altered amounts in 1w complete animals, relative to 1w garland cells.

### **Supplementary Data 3b: Increased in 1w GNCs vs Total (Figure S1B')**

Depicted are proteins with increased abundance in 1w garland cells, relative to 1w complete animals. Proteins are allocated to their individual KEGG pathways.

### **Supplementary Data 3c: Increased in 1w Total vs 1w GNCs (Figure S1C')**

Depicted are proteins with increased abundance in 1w complete animals, relative to 1w garland cells. Proteins are allocated to their individual KEGG pathways.

### **Supplementary Data 4a: larval PNCs vs 1w PNCs (Figure 7A')**

Depicted are proteins that exhibit altered amounts in larval pericardial cells, relative to 1w pericardial cells.

### **Supplementary Data 4b: Increased in larval PNCs vs 1w PNCs (Figure 7B')**

Depicted are proteins with increased abundance in larval pericardial cells, relative to 1w pericardial cells. Proteins are allocated to their individual KEGG pathways.

### **Supplementary Data 4c: Increased in 1w PNCs vs larval PNCs (Figure 7C')**

46 Depicted are proteins with increased abundance in 1w pericardial cells, relative to larval pericardial  
47 cells. Proteins are allocated to their individual KEGG pathways.  
48

49 **Supplementary Data 5a: 1w PNCs vs 3w PNCs (Figure 8G)**

50 Depicted are proteins that exhibit altered amounts in 1w pericardial cells, relative to 3w pericardial cells.  
51

52 **Supplementary Data 5b: 1w PNCs vs 5w PNCs (Figure 8G)**

53 Depicted are proteins that exhibit altered amounts in 1w pericardial cells, relative to 5w pericardial cells.  
54

55 **Supplementary Data 5c: Increased in 3w PNCs vs 1w PNCs (Figure 8H)**

56 Depicted are proteins with increased abundance in 3w pericardial cells, relative to 1w pericardial cells.  
57 Proteins are allocated to their individual KEGG pathways.  
58

59 **Supplementary Data 5d: Reduced in 5w PNCs vs 1w PNCs (Figure 8I)**

60 Depicted are proteins with reduced abundance in 5w pericardial cells, relative to 1w pericardial cells.  
61 Proteins are allocated to their individual KEGG pathways.  
62

63 **Supplementary Data 6a: 1w GNCs vs 5w GNCs (Figure S2A)**

64 Depicted are proteins that exhibit altered amounts in 1w garland cells, relative to 5w garland cells.  
65

66 **Supplementary Data 6b: Increased in 1w GNCs vs 5w GNCs (Figure S2B)**

67 Depicted are proteins with increased abundance in 1w garland cells, relative to 5w garland cells.  
68 Proteins are allocated to their individual KEGG pathways.  
69

70 **Supplementary Data 6c: Increased in 5w GNCs vs 1w GNCs (Figure S2C)**

71 Depicted are proteins with increased abundance in 5w garland cells, relative to 1w garland cells.  
72 Proteins are allocated to their individual KEGG pathways.  
73  
74
